# Supplementary material
Source: publisher site journal article supplement (https://www.dovepress.com/article/354611)
Supplement: Supplementary file 1 [file get_supplementary_file.php]

**Supplementary Information**


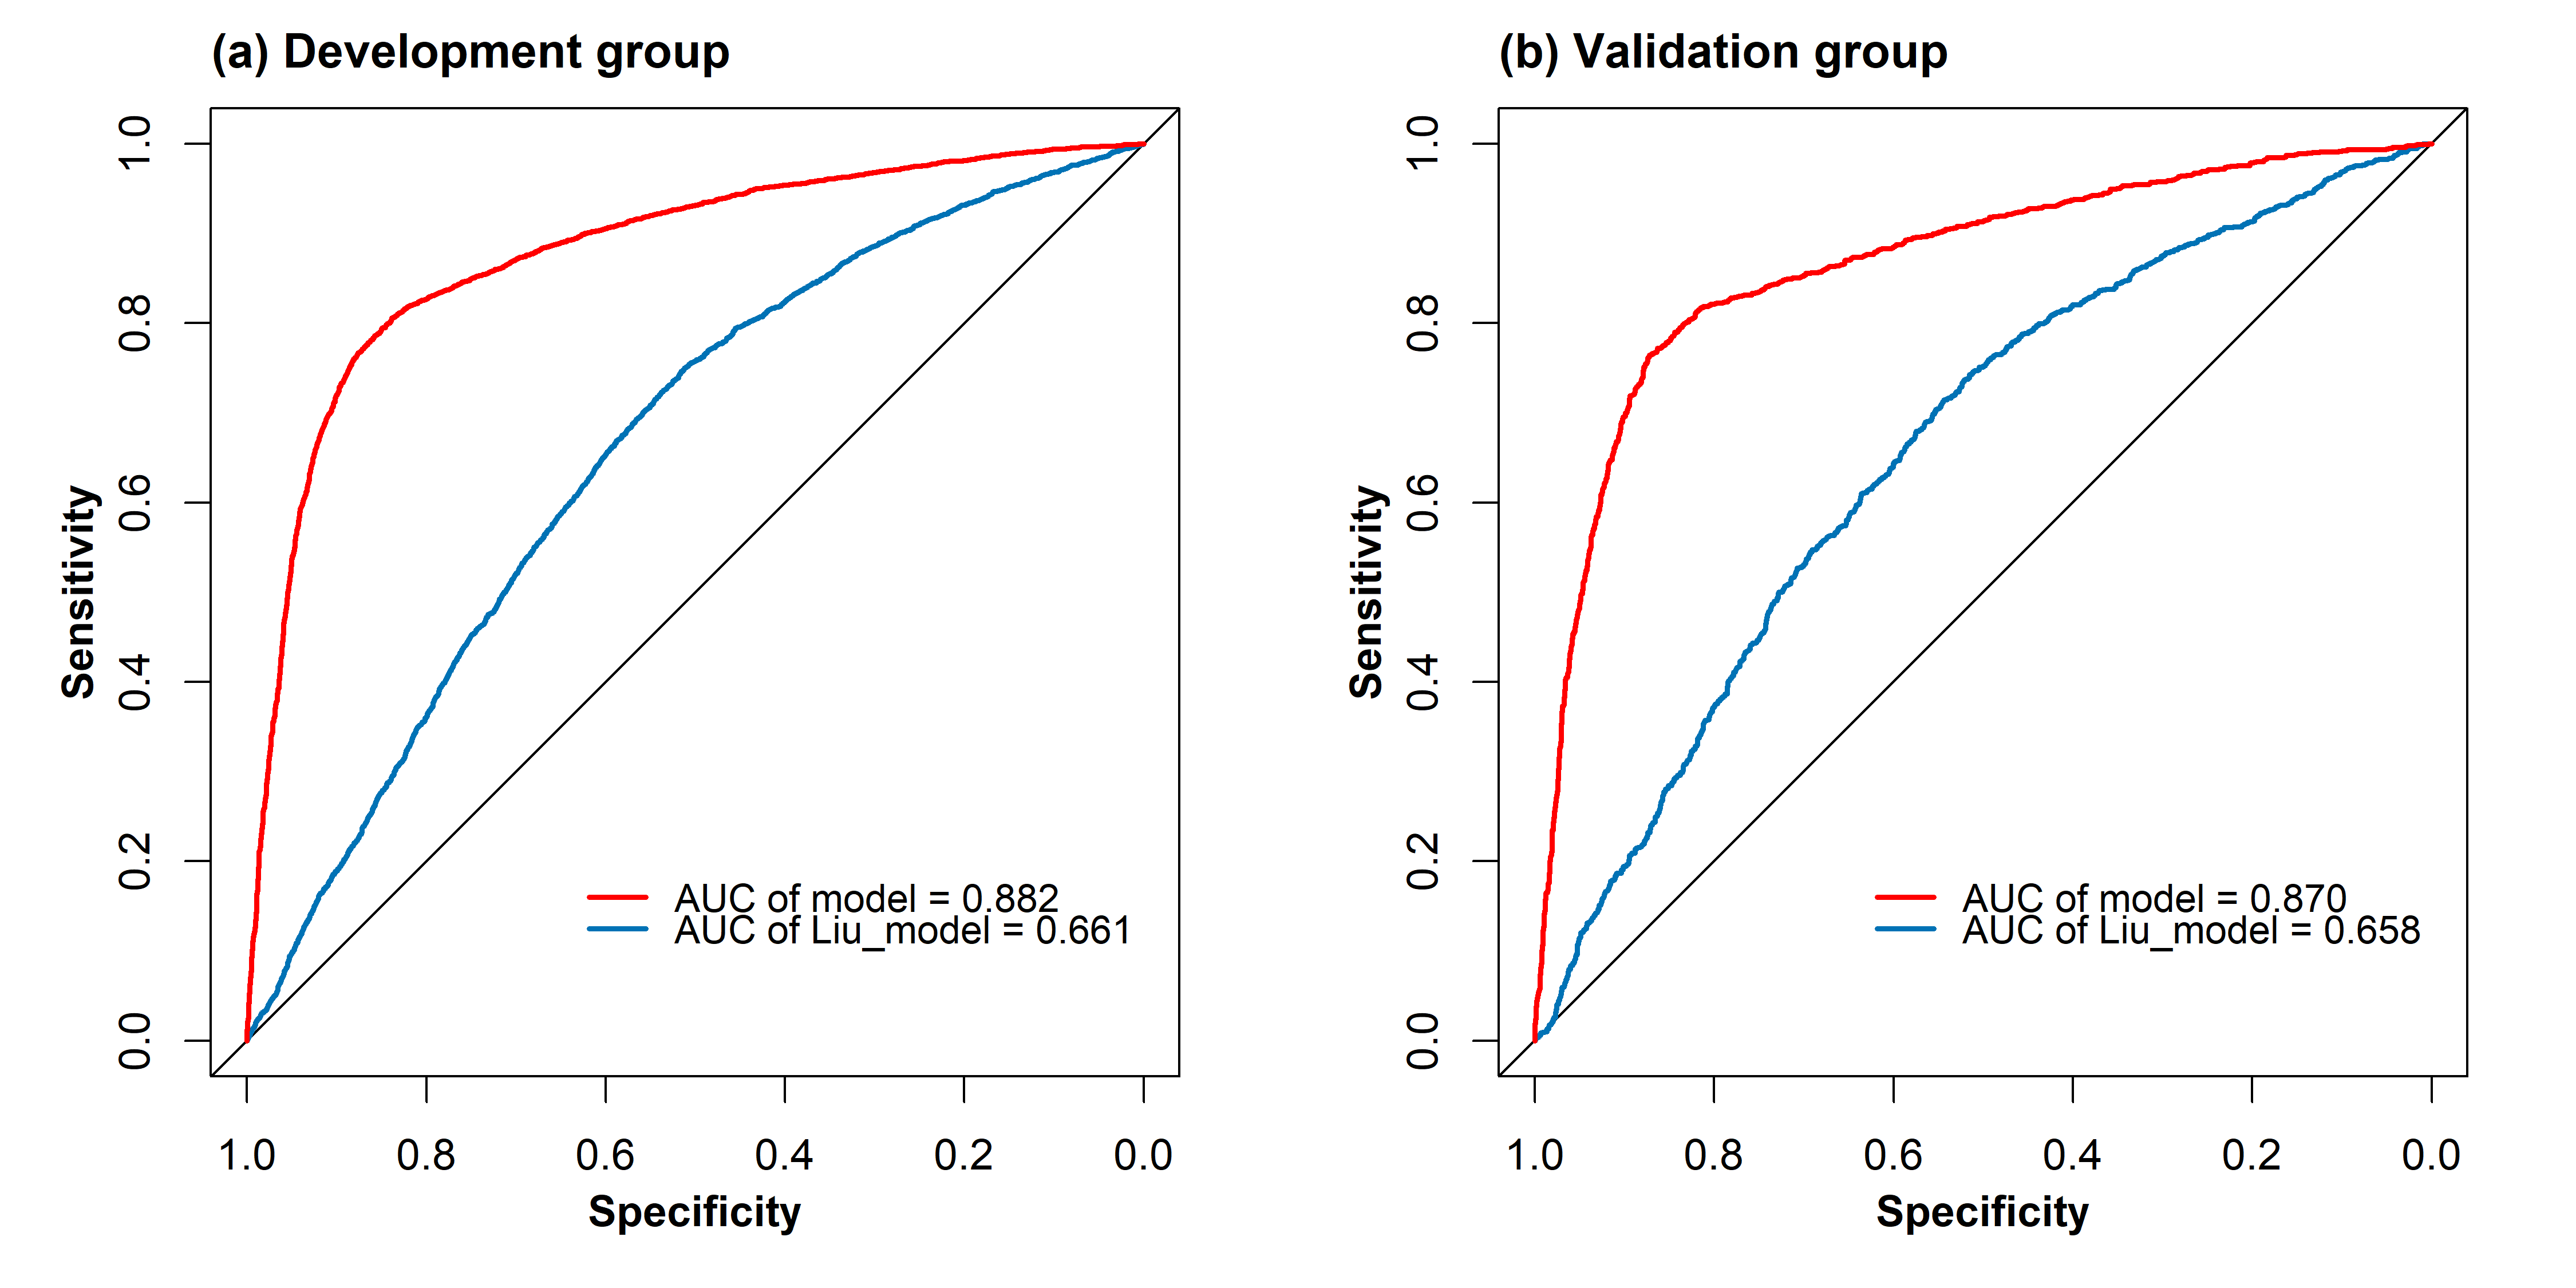


**Supplementary Figure S1** The ROC curves of the nomogram for DR risk (left: Development group, right: Validation group).

**Note:**The red line represents the model studied in this paper, the blue line represents the model studied by Liu Y et al.12
